# Supplementary material
Source: publisher site journal article supplement (https://www.dovepress.com/article/411199)
Supplement: Supplementary file 1 [file get_supplementary_file.php]

**A**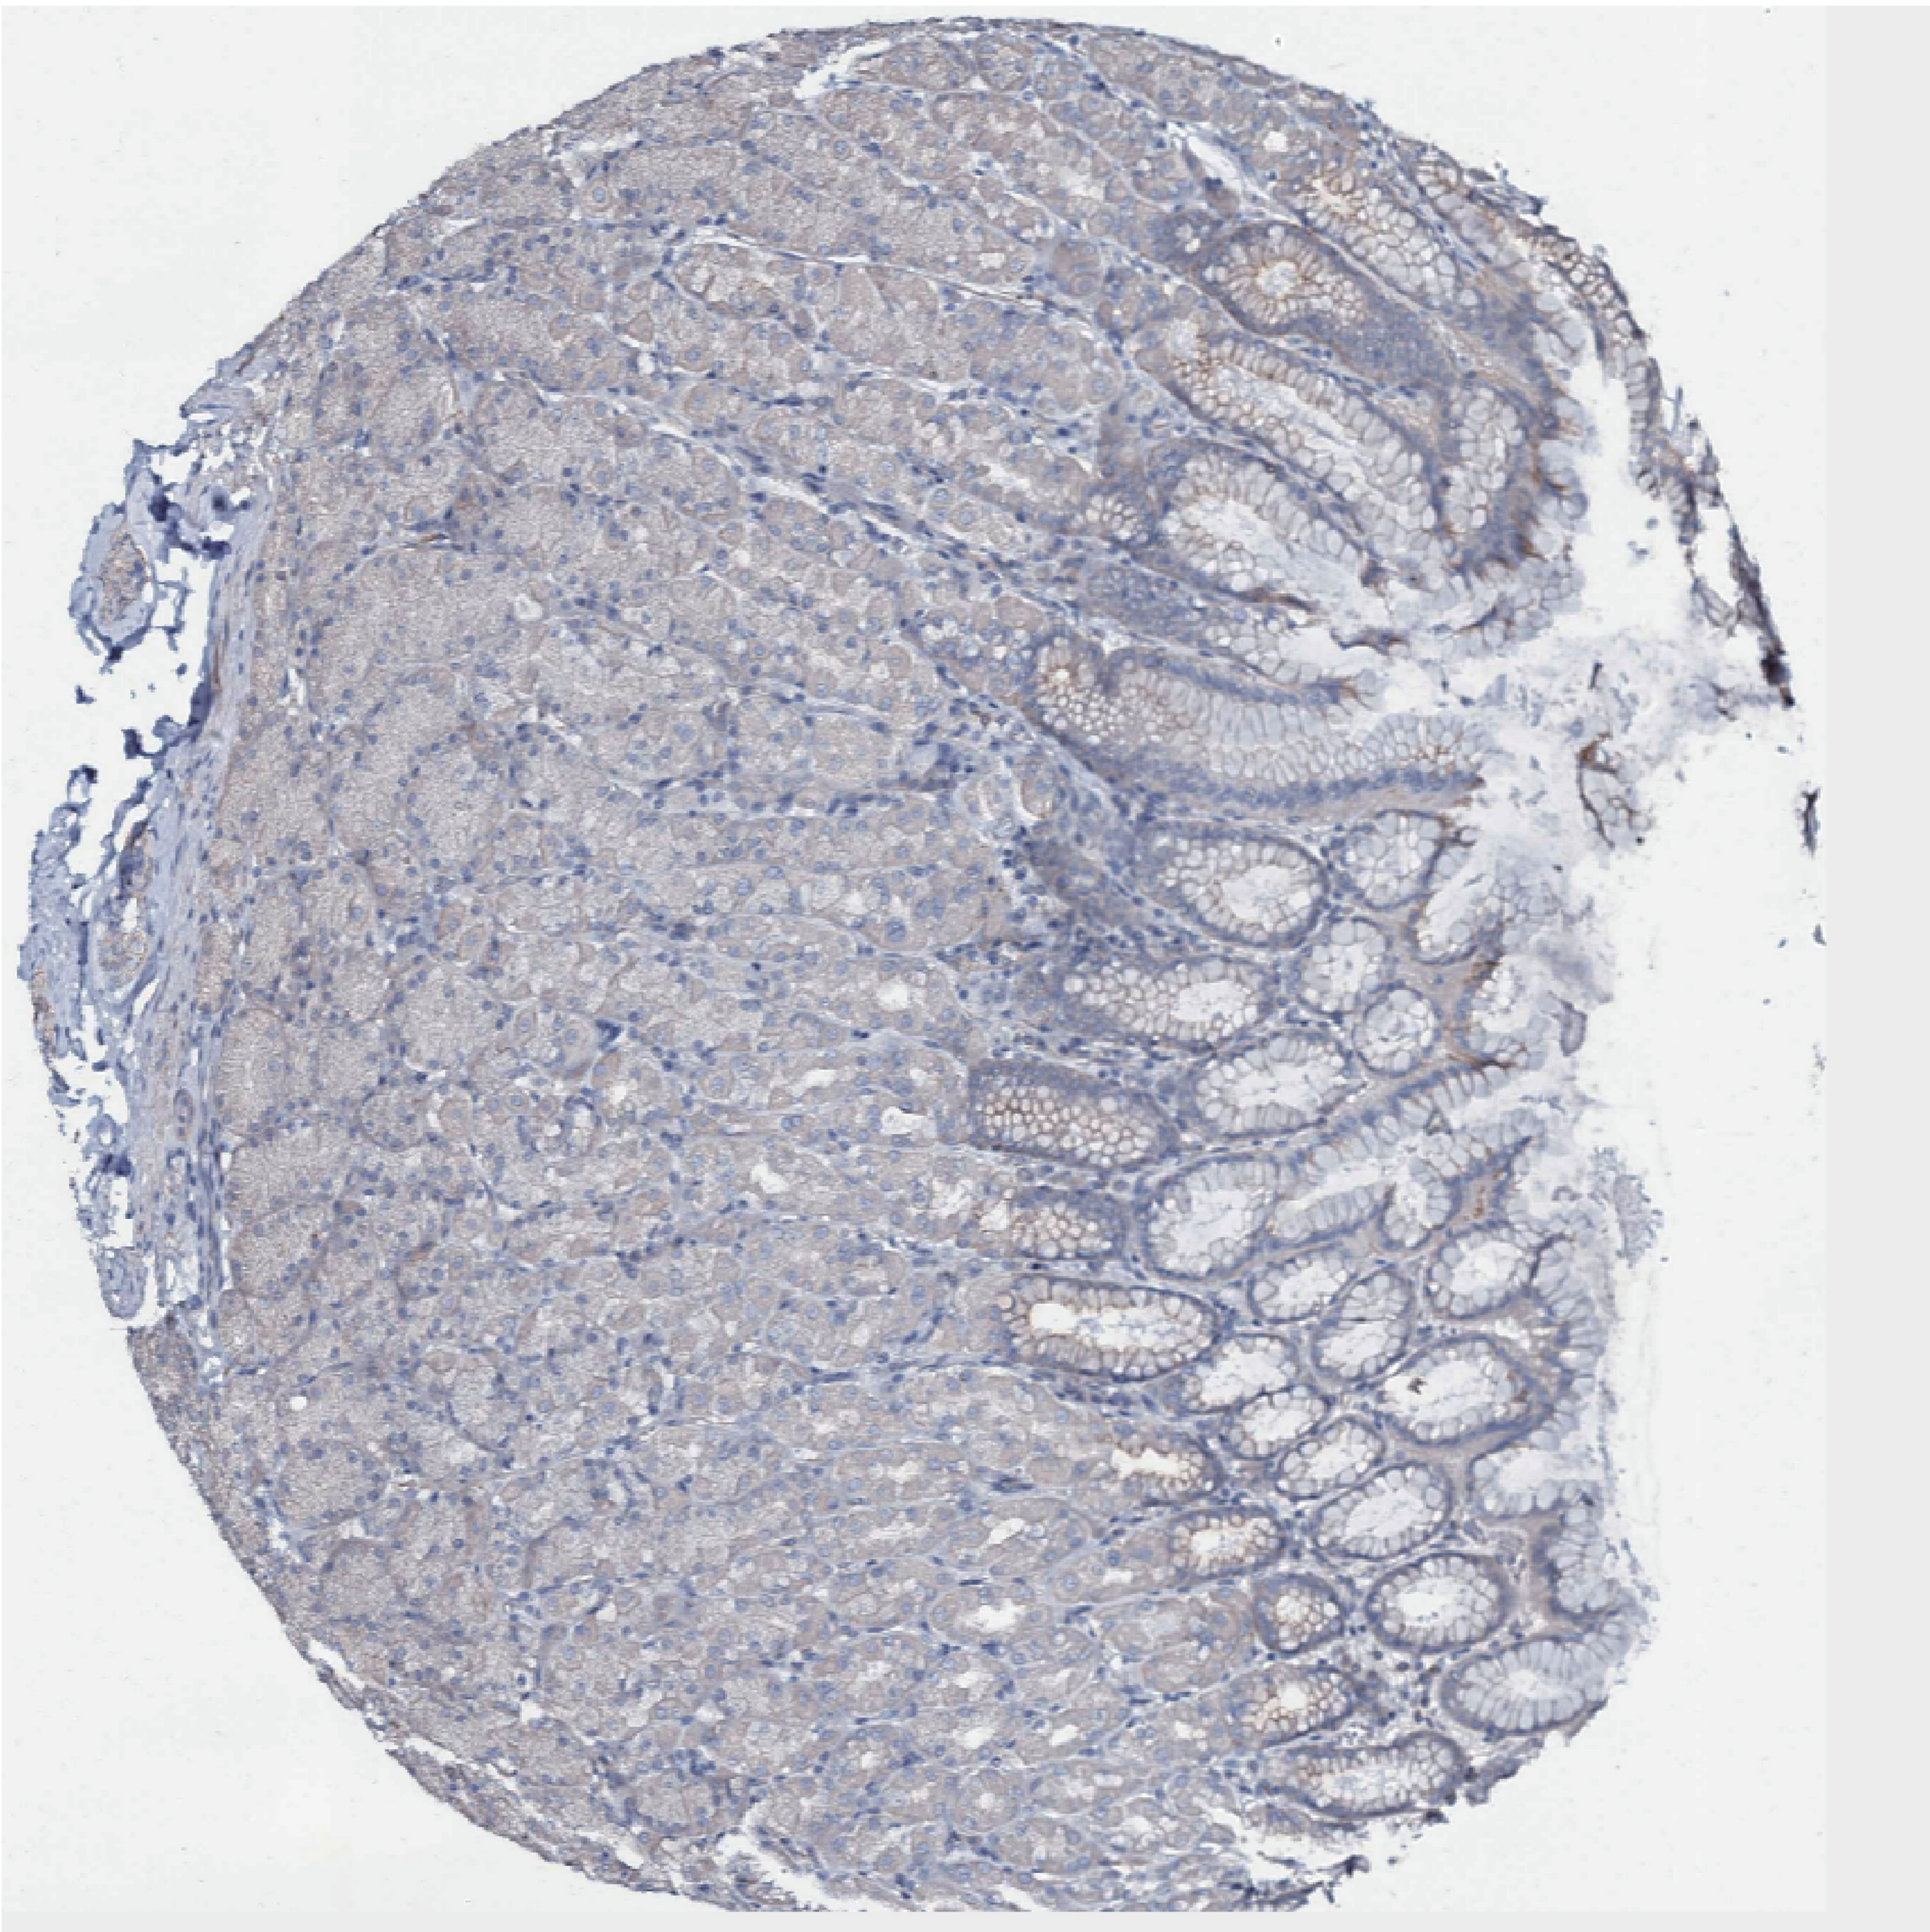**B**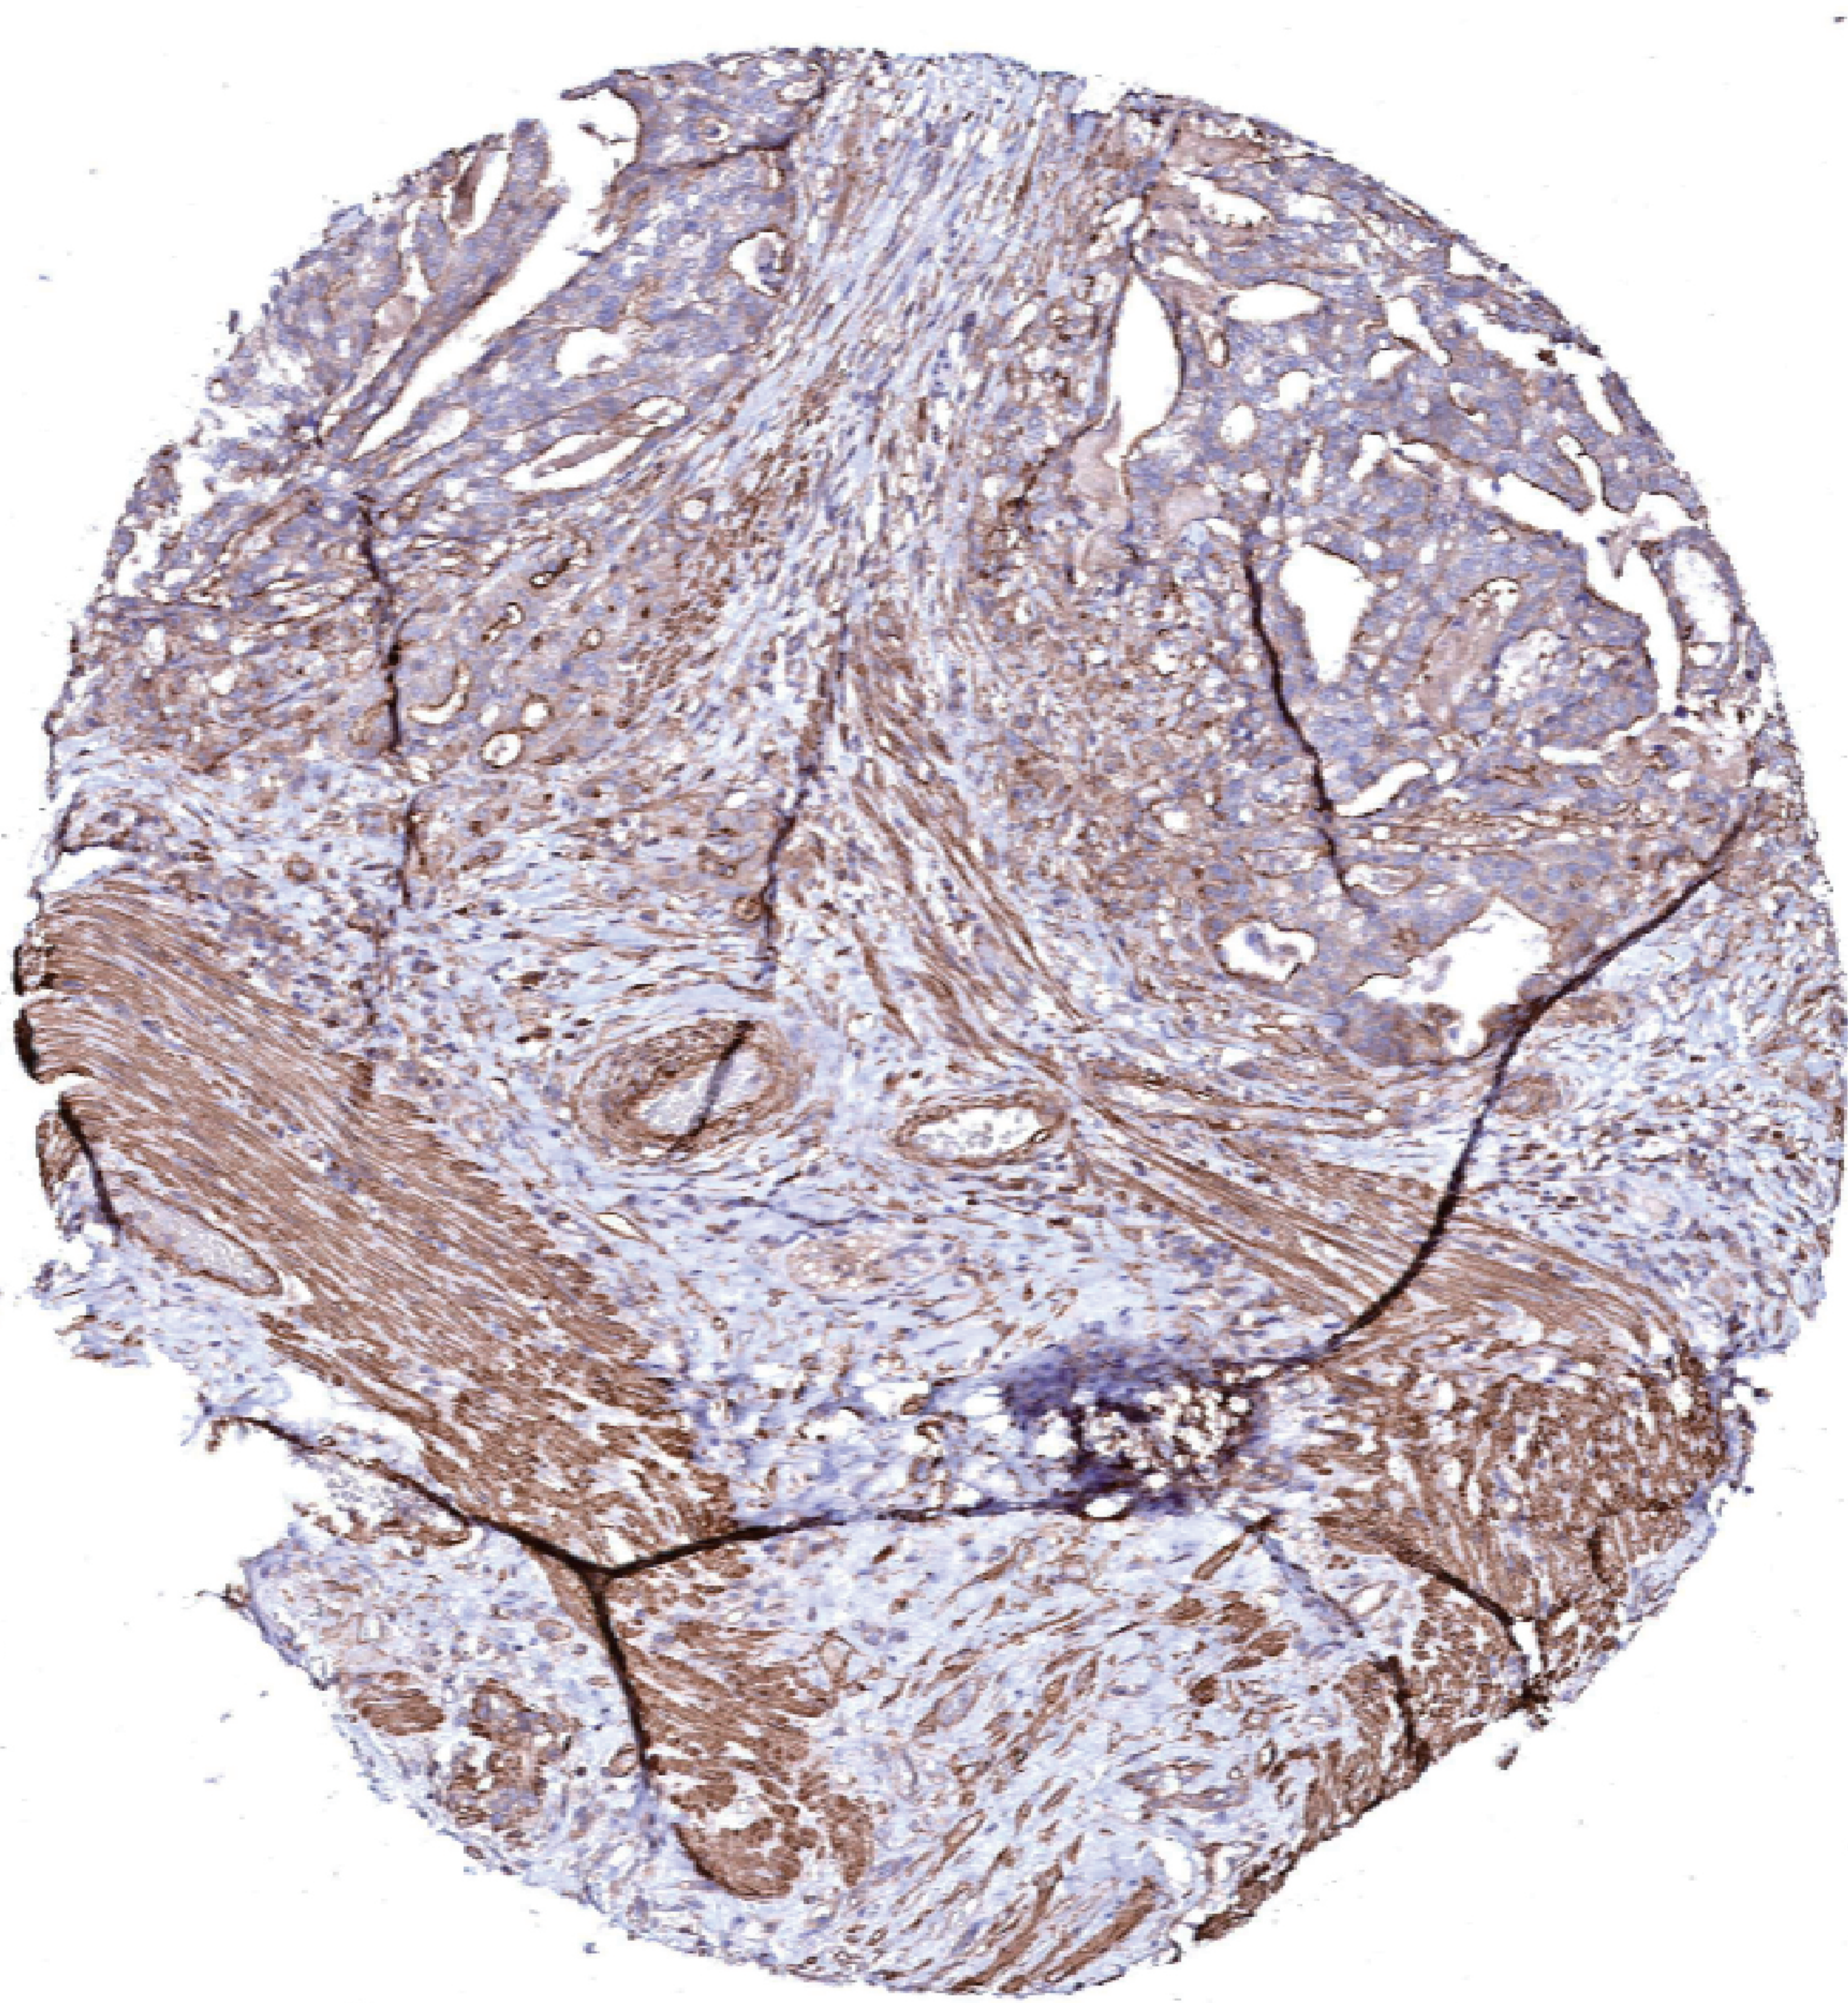**C****Normal**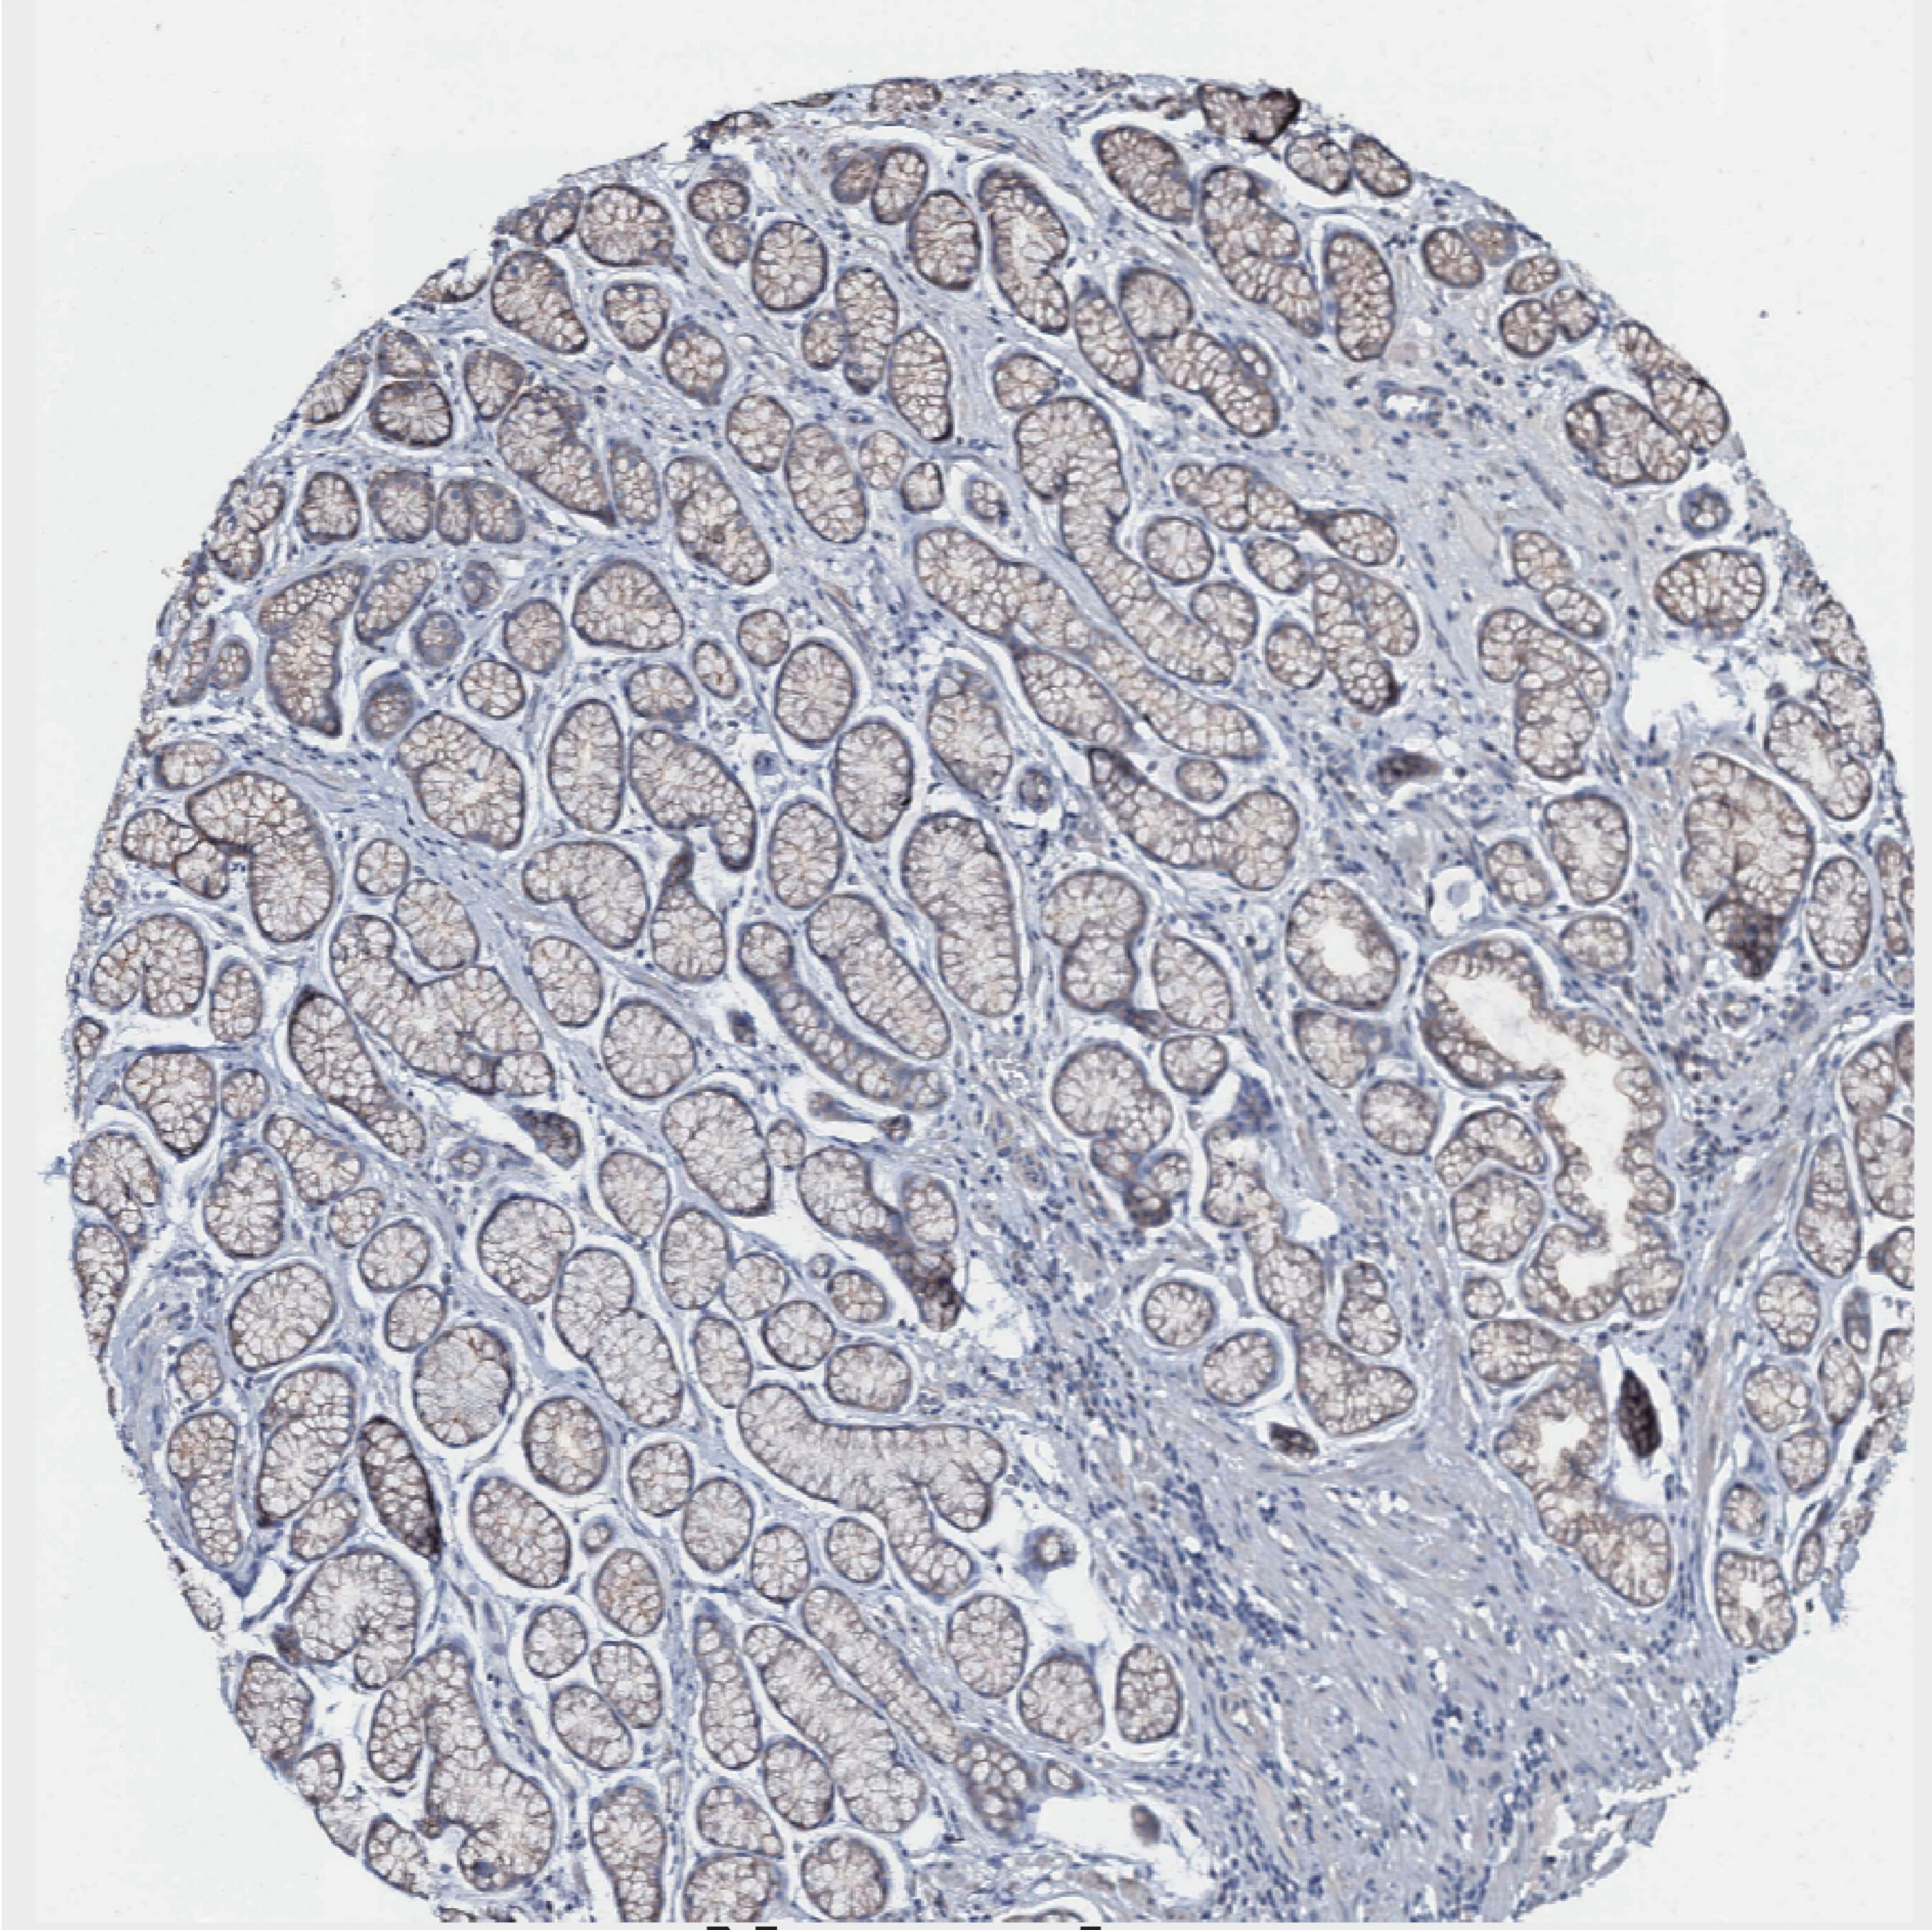**D****Tumor**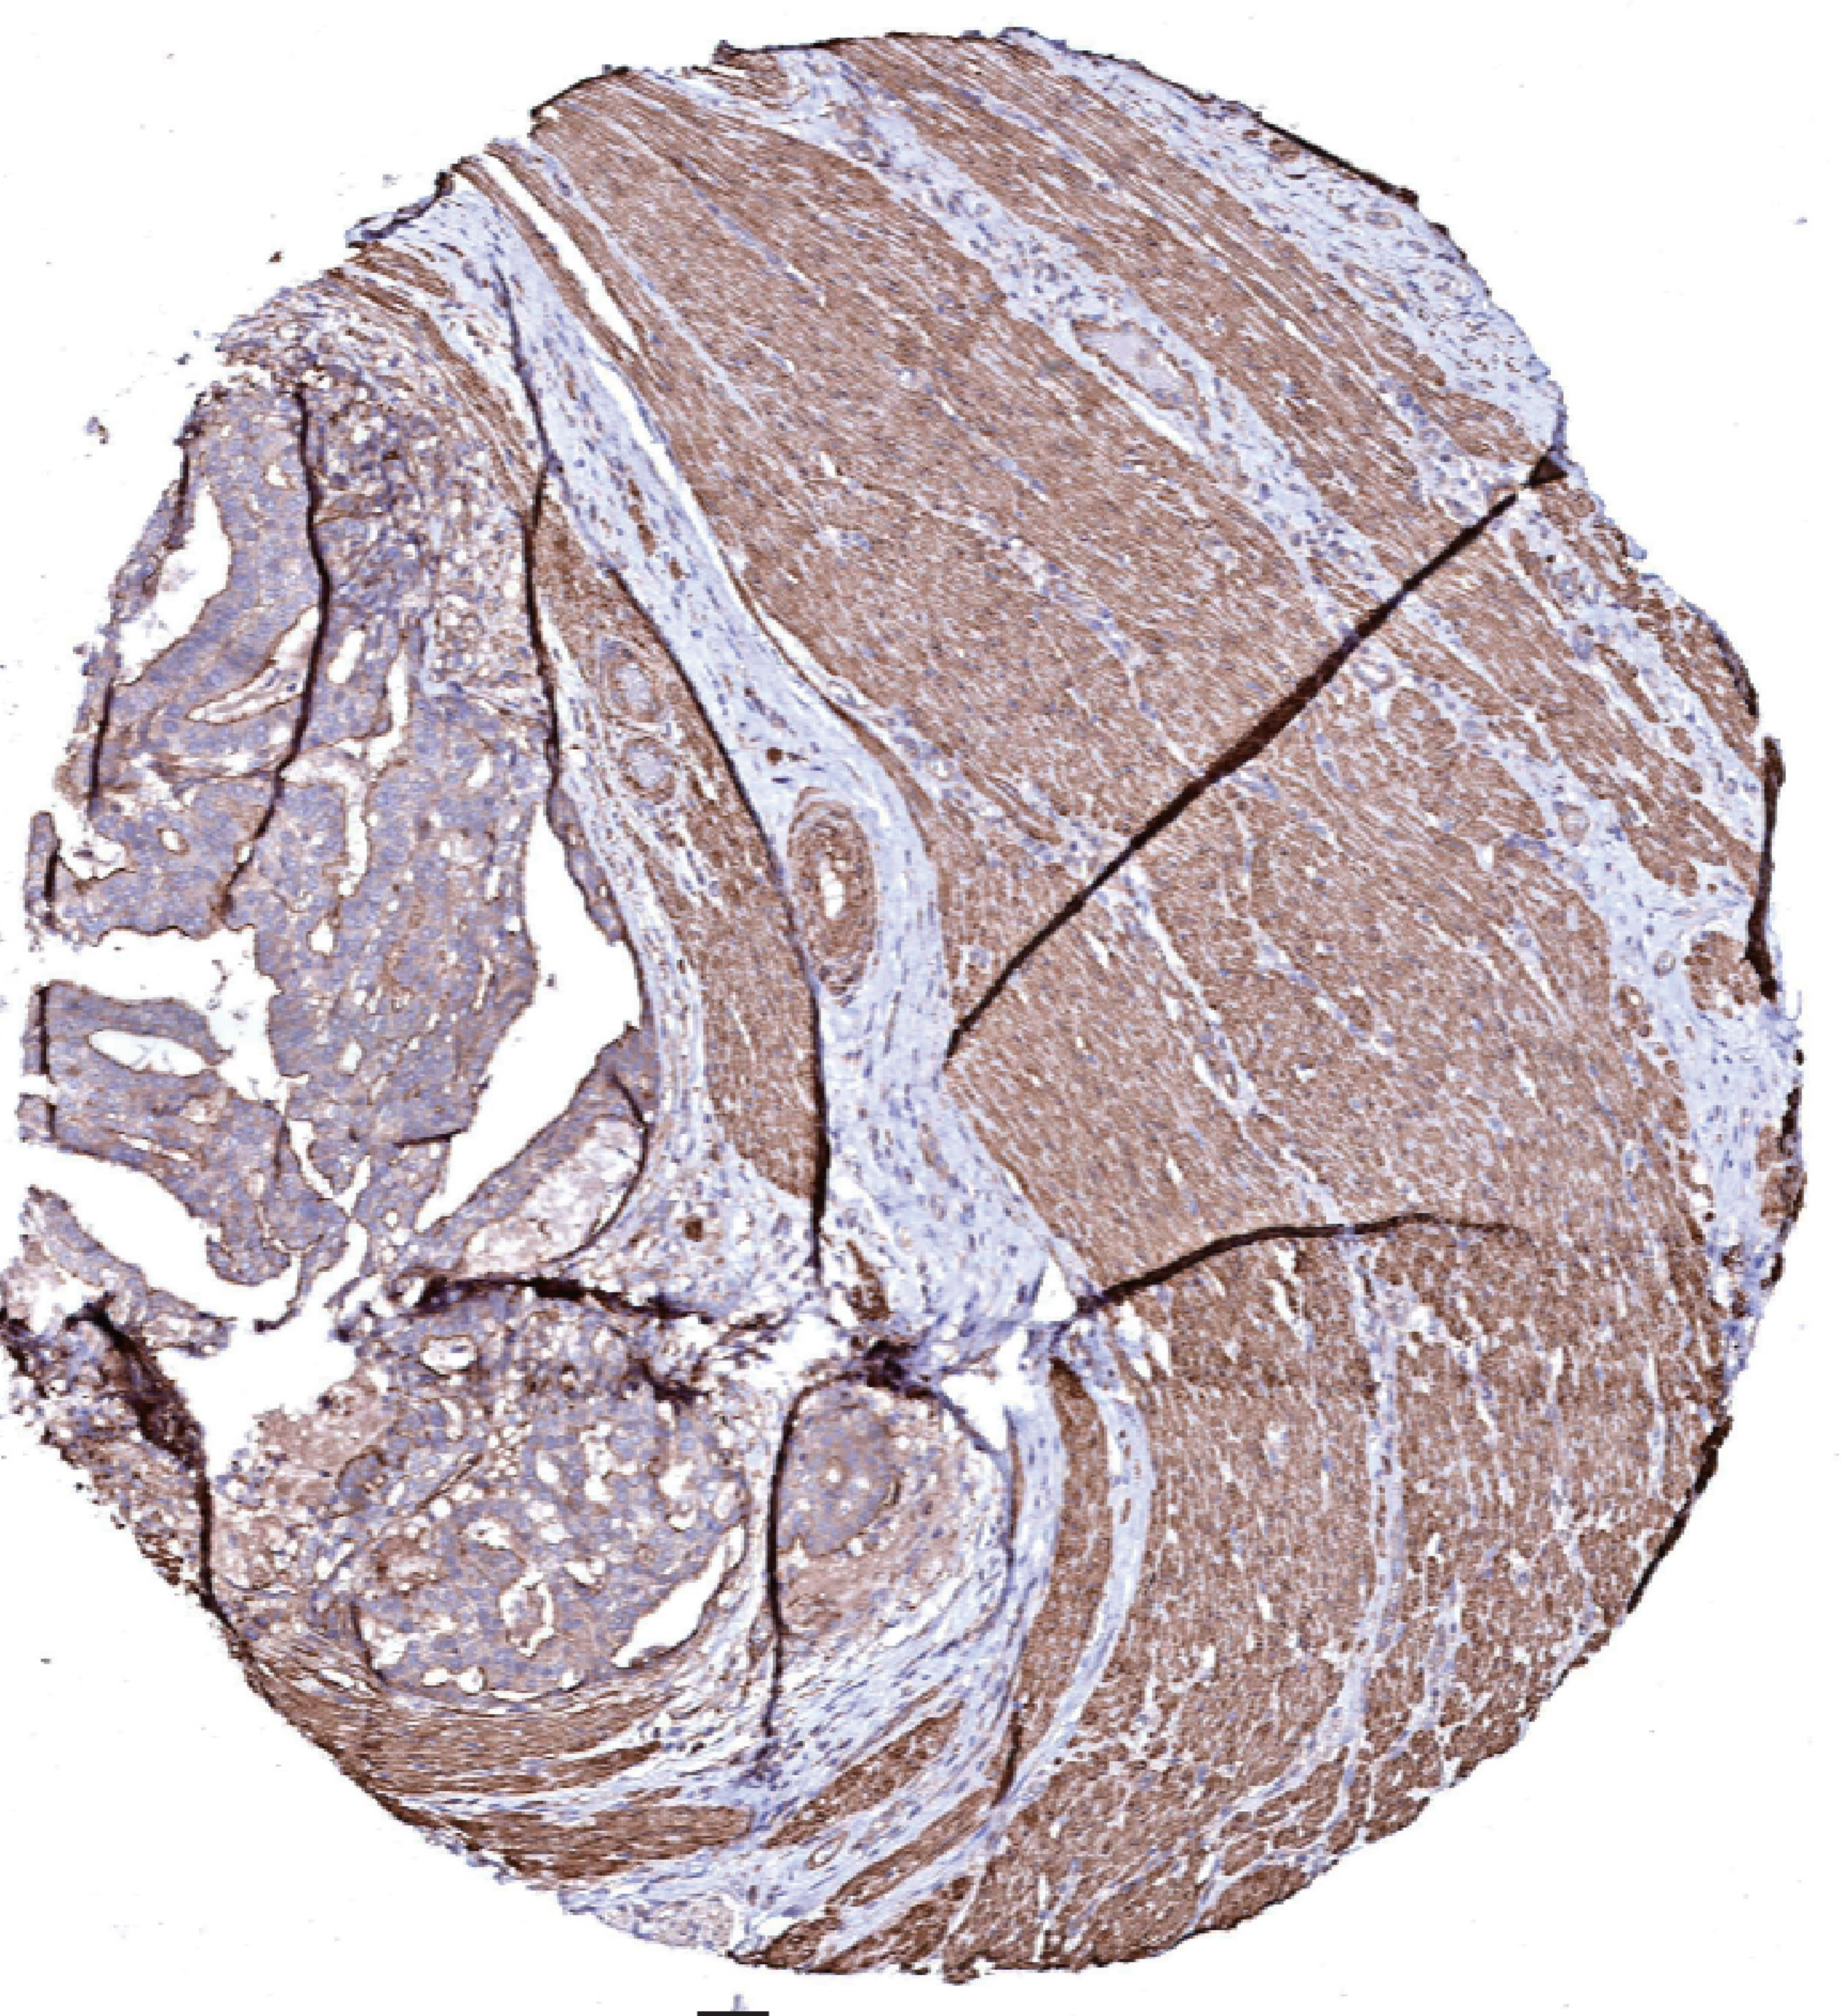**Normal****Tumor**

**Supplementary Figure S1.** GPR176 expression in cancer tissues and surrounding normal tissues. (A-D) Analysis of immunohistochemical staining in the HPA database showed higher expression of GPR176 in GC compared to adjacent healthy tissues.

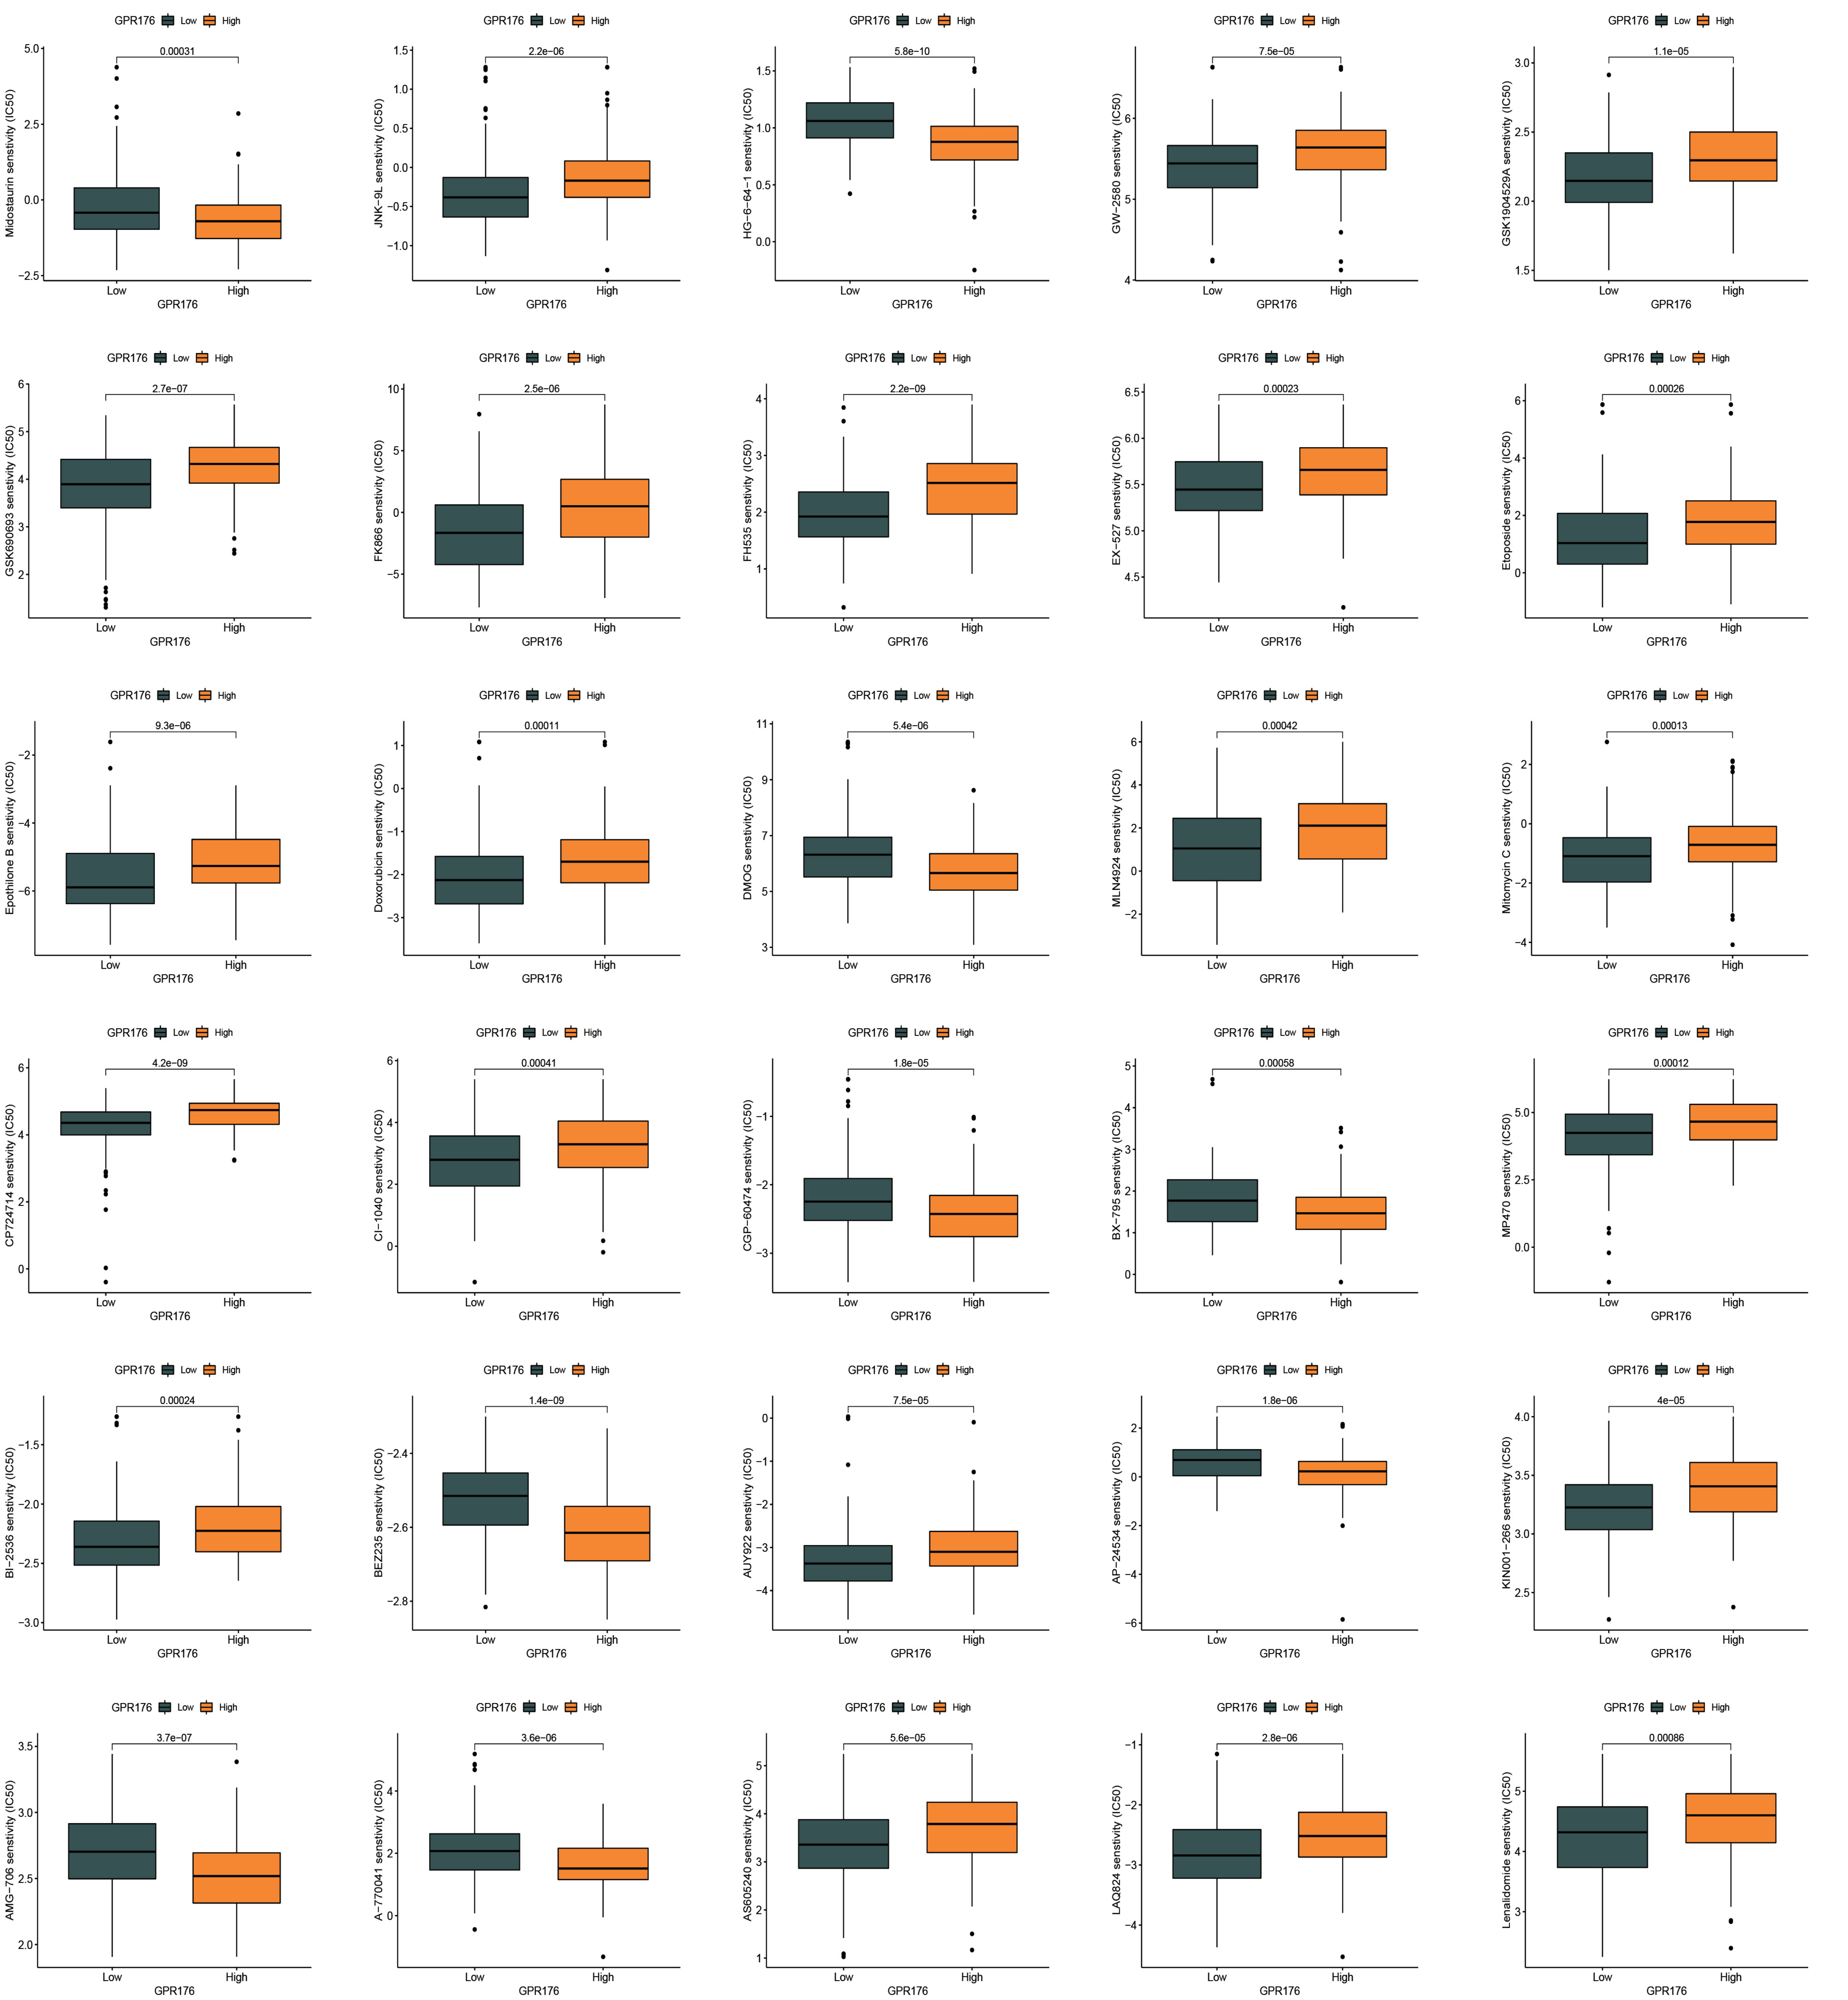

**Supplementary Figure S2.** Differences in drug treatment sensitivity between high and low GPR176 groups.

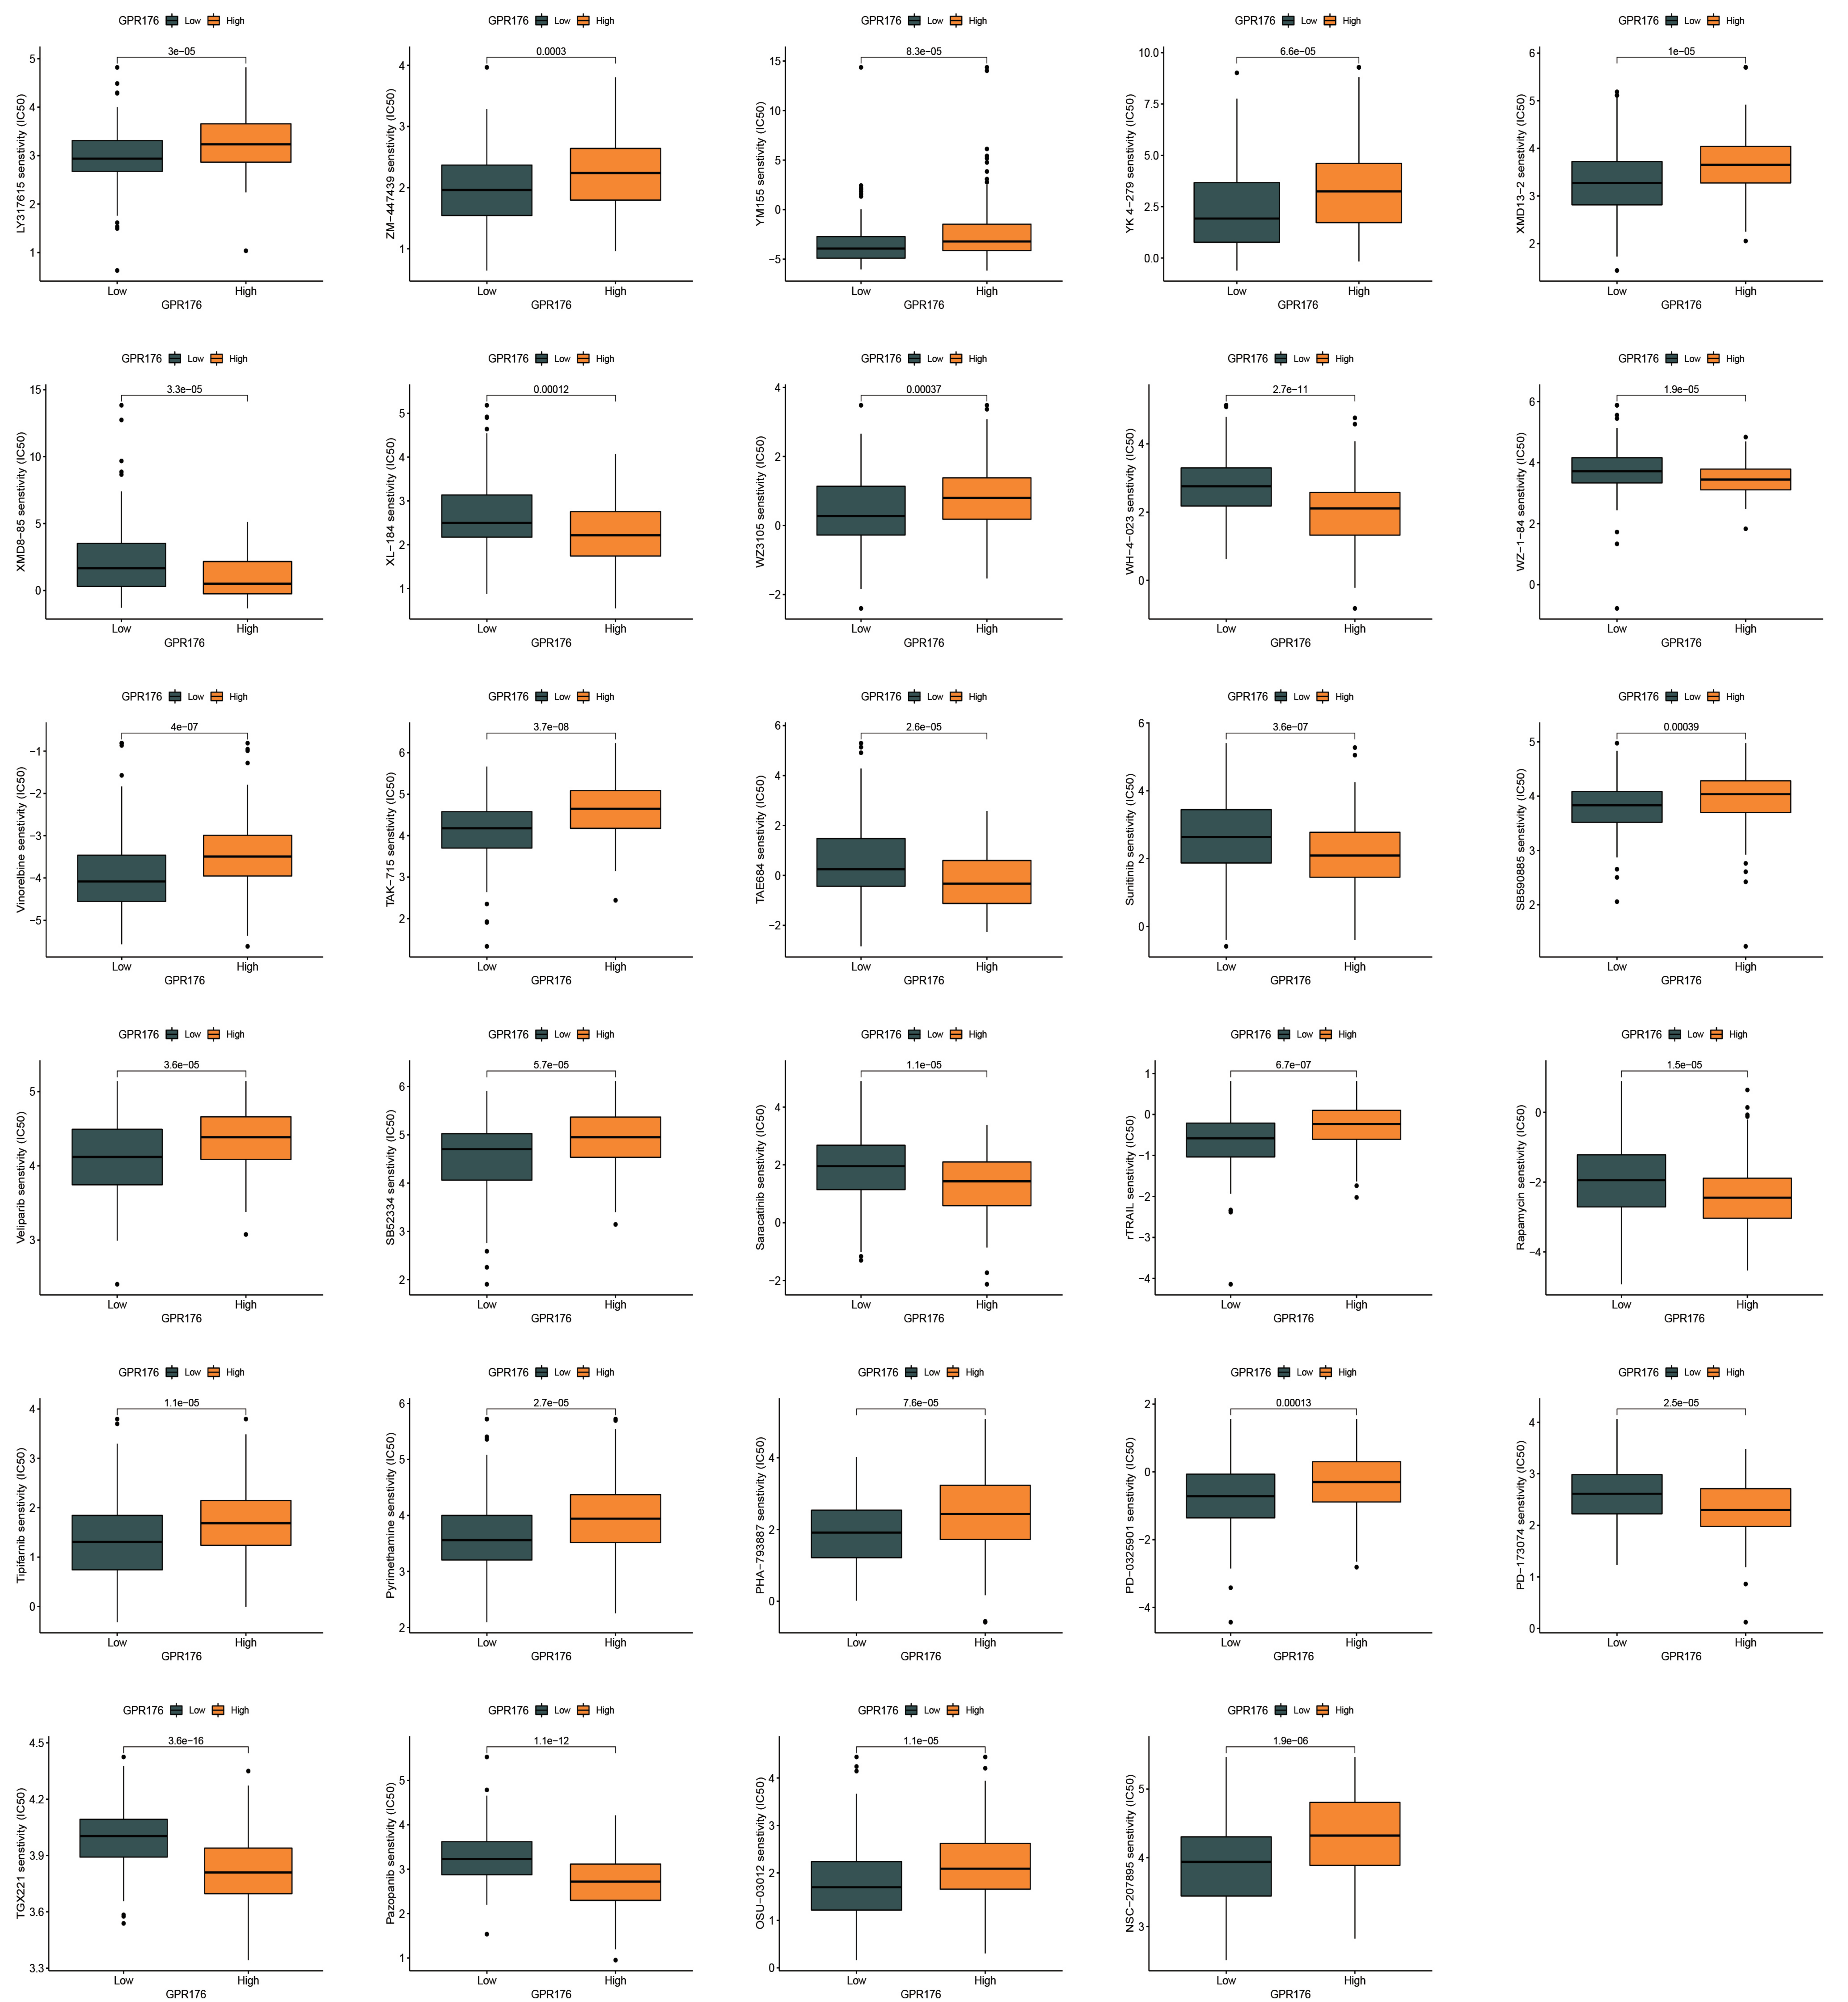

**Supplementary Figure S3.** Differences in drug treatment sensitivity between high and low GPR176 groups.
